# Supplementary material for: Impact of UVC-sustained recirculating air filtration on airborne bacteria and dust in a pig facility
Source: PubMed Central journal article supplement (PMC6837447; doi:10.1371/journal.pone.0225047), 2019-11-07
Supplement: pone.0225047.s002.pdf [file pone.0225047.s002.pdf]

# UVGI CALCULATION

## Project Information

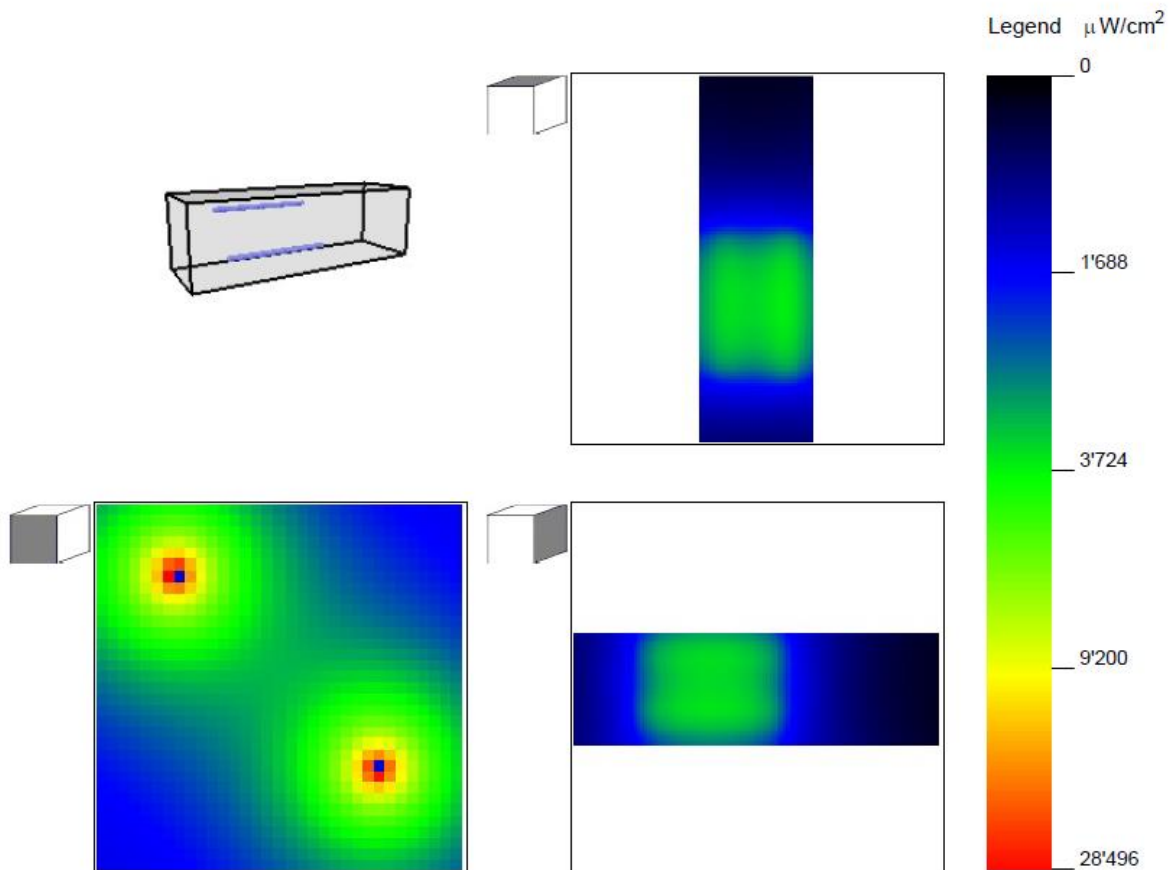

Minimal Intensity: 45  $\mu\text{W}/\text{cm}^2$   
Maximal Intensity: 28'396  $\mu\text{W}/\text{cm}^2$   
Average Intensity: 1'612  $\mu\text{W}/\text{cm}^2$

Air Volume: 1800.0  $\text{m}^3/\text{h}$   
Time of Exposure: 1.13 s  
Air Temperature: 20.0  $^\circ\text{C}$   
Relative Humidity [RH]: 66 %
